# Supplementary material for: Effects of Scale, Question Location, Order of Response Alternatives, and Season on Self-Reported Noise Annoyance Using ICBEN Scales: A Field Experiment
Source: MDPI journal article supplement (doi:10.3390/ijerph13111163), 2016-11-23
Supplement: s1 [file s1]

Please answer all questions one by one in sequence. Always tick the answer/checkbox that best applies to you. If multiple answers apply, tick all that apply. Thank you very much.

| Living Environment and Noise                |                                                                                                                                                                                                                                                                                                                                                                                                                                                                                                                                                                                                                                                                                                                                                                                                                                                                                                                                                                                                                                                                                                                                                                                                                                                                                                                                                                                                                                                                                                                                                                                                                                                                                                                                                                                                                                                                                                                                                                                                                                                                                                                                                                                                                                                                                                                                                                                                                                                                                                                                                                                                                                                                                                                                                                                                                                                                                                                                                                                                                                                                                                                                                                                                                                                                                                                                                                                                                                                                                                                                                                                                                                                                                                                                                                                                                                                                                                                                                                                                                                                                                                                                                                                                                                                                                                                                                                                                                                                                                                                                                                                                                                                                                                                                                                                                                                                                                |                                                                                                                                                                                                                                                                                                                                                                                                                                                                                                                                                                                                                                                                                                                                                                                                                                      |                                                                                      |                                                                                      |                                                                                      |                      |                    |                    |              |                   |                                   |                                                                                      |                                                                                      |                                                                                      |                                                                                      |                                                                                      |                      |                                                                                      |                                                                                      |                                                                                      |                                                                                      |                                                                                      |                                          |                                                                                      |                                                                                      |                                                                                      |                                                                                      |                                                                                      |                           |                                                                                      |                                                                                      |                                                                                      |                                                                                      |                                                                                      |                                             |                                                                                      |                                                                                      |                                                                                      |                                                                                      |                                                                                      |                             |                                                                                      |                                                                                      |                                                                                      |                                                                                      |                                                                                      |                                        |
|---------------------------------------------|--------------------------------------------------------------------------------------------------------------------------------------------------------------------------------------------------------------------------------------------------------------------------------------------------------------------------------------------------------------------------------------------------------------------------------------------------------------------------------------------------------------------------------------------------------------------------------------------------------------------------------------------------------------------------------------------------------------------------------------------------------------------------------------------------------------------------------------------------------------------------------------------------------------------------------------------------------------------------------------------------------------------------------------------------------------------------------------------------------------------------------------------------------------------------------------------------------------------------------------------------------------------------------------------------------------------------------------------------------------------------------------------------------------------------------------------------------------------------------------------------------------------------------------------------------------------------------------------------------------------------------------------------------------------------------------------------------------------------------------------------------------------------------------------------------------------------------------------------------------------------------------------------------------------------------------------------------------------------------------------------------------------------------------------------------------------------------------------------------------------------------------------------------------------------------------------------------------------------------------------------------------------------------------------------------------------------------------------------------------------------------------------------------------------------------------------------------------------------------------------------------------------------------------------------------------------------------------------------------------------------------------------------------------------------------------------------------------------------------------------------------------------------------------------------------------------------------------------------------------------------------------------------------------------------------------------------------------------------------------------------------------------------------------------------------------------------------------------------------------------------------------------------------------------------------------------------------------------------------------------------------------------------------------------------------------------------------------------------------------------------------------------------------------------------------------------------------------------------------------------------------------------------------------------------------------------------------------------------------------------------------------------------------------------------------------------------------------------------------------------------------------------------------------------------------------------------------------------------------------------------------------------------------------------------------------------------------------------------------------------------------------------------------------------------------------------------------------------------------------------------------------------------------------------------------------------------------------------------------------------------------------------------------------------------------------------------------------------------------------------------------------------------------------------------------------------------------------------------------------------------------------------------------------------------------------------------------------------------------------------------------------------------------------------------------------------------------------------------------------------------------------------------------------------------------------------------------------------------------------------------------|--------------------------------------------------------------------------------------------------------------------------------------------------------------------------------------------------------------------------------------------------------------------------------------------------------------------------------------------------------------------------------------------------------------------------------------------------------------------------------------------------------------------------------------------------------------------------------------------------------------------------------------------------------------------------------------------------------------------------------------------------------------------------------------------------------------------------------------|--------------------------------------------------------------------------------------|--------------------------------------------------------------------------------------|--------------------------------------------------------------------------------------|----------------------|--------------------|--------------------|--------------|-------------------|-----------------------------------|--------------------------------------------------------------------------------------|--------------------------------------------------------------------------------------|--------------------------------------------------------------------------------------|--------------------------------------------------------------------------------------|--------------------------------------------------------------------------------------|----------------------|--------------------------------------------------------------------------------------|--------------------------------------------------------------------------------------|--------------------------------------------------------------------------------------|--------------------------------------------------------------------------------------|--------------------------------------------------------------------------------------|------------------------------------------|--------------------------------------------------------------------------------------|--------------------------------------------------------------------------------------|--------------------------------------------------------------------------------------|--------------------------------------------------------------------------------------|--------------------------------------------------------------------------------------|---------------------------|--------------------------------------------------------------------------------------|--------------------------------------------------------------------------------------|--------------------------------------------------------------------------------------|--------------------------------------------------------------------------------------|--------------------------------------------------------------------------------------|---------------------------------------------|--------------------------------------------------------------------------------------|--------------------------------------------------------------------------------------|--------------------------------------------------------------------------------------|--------------------------------------------------------------------------------------|--------------------------------------------------------------------------------------|-----------------------------|--------------------------------------------------------------------------------------|--------------------------------------------------------------------------------------|--------------------------------------------------------------------------------------|--------------------------------------------------------------------------------------|--------------------------------------------------------------------------------------|----------------------------------------|
| 2.1                                         | Thinking about the last 12 months, when you are here at home, how much did road traffic noise bother, disturb, or annoy you?                                                                                                                                                                                                                                                                                                                                                                                                                                                                                                                                                                                                                                                                                                                                                                                                                                                                                                                                                                                                                                                                                                                                                                                                                                                                                                                                                                                                                                                                                                                                                                                                                                                                                                                                                                                                                                                                                                                                                                                                                                                                                                                                                                                                                                                                                                                                                                                                                                                                                                                                                                                                                                                                                                                                                                                                                                                                                                                                                                                                                                                                                                                                                                                                                                                                                                                                                                                                                                                                                                                                                                                                                                                                                                                                                                                                                                                                                                                                                                                                                                                                                                                                                                                                                                                                                                                                                                                                                                                                                                                                                                                                                                                                                                                                                   | <div style="display: flex; justify-content: space-around; font-weight: bold; font-size: 0.9em;"> <span>not at all</span> <span>slightly</span> <span>moderately</span> <span>very</span> <span>extremely</span> </div> <div style="display: flex; justify-content: space-around; align-items: center; margin-top: 5px;"> <input style="width: 20px; height: 20px; border: 1px solid black;" type="checkbox"/> <span>—</span> <input style="width: 20px; height: 20px; border: 1px solid black;" type="checkbox"/> <span>—</span> <input style="width: 20px; height: 20px; border: 1px solid black;" type="checkbox"/> <span>—</span> <input style="width: 20px; height: 20px; border: 1px solid black;" type="checkbox"/> <span>—</span> <input style="width: 20px; height: 20px; border: 1px solid black;" type="checkbox"/> </div> | 21a                                                                                  |                                                                                      |                                                                                      |                      |                    |                    |              |                   |                                   |                                                                                      |                                                                                      |                                                                                      |                                                                                      |                                                                                      |                      |                                                                                      |                                                                                      |                                                                                      |                                                                                      |                                                                                      |                                          |                                                                                      |                                                                                      |                                                                                      |                                                                                      |                                                                                      |                           |                                                                                      |                                                                                      |                                                                                      |                                                                                      |                                                                                      |                                             |                                                                                      |                                                                                      |                                                                                      |                                                                                      |                                                                                      |                             |                                                                                      |                                                                                      |                                                                                      |                                                                                      |                                                                                      |                                        |
| 2.2                                         | <p>Below is a 0 to 10 opinion scale for how much road traffic noise bothered, disturbed or annoyed you. If you were not at all annoyed choose 0, if you were extremely annoyed choose 10, if you were somewhere in between choose a number between 0 and 10.</p> <p>Thinking about the last 12 months, when your are here at home, what number from 0 to 10 best shows how much you were bothered, disturbed, or annoyed by road traffic noise?</p> <div style="text-align: center; margin-top: 10px;"> <div style="display: flex; justify-content: space-between; width: 100%;"> <span>0</span> <span>1</span> <span>2</span> <span>3</span> <span>4</span> <span>5</span> <span>6</span> <span>7</span> <span>8</span> <span>9</span> <span>10</span> </div> <div style="display: flex; justify-content: space-between; width: 100%; font-size: 0.8em; margin-top: 5px;"> <span>not at all</span> <span></span> <span></span> <span></span> <span></span> <span></span> <span></span> <span></span> <span></span> <span></span> <span>extremely</span> </div> </div>                                                                                                                                                                                                                                                                                                                                                                                                                                                                                                                                                                                                                                                                                                                                                                                                                                                                                                                                                                                                                                                                                                                                                                                                                                                                                                                                                                                                                                                                                                                                                                                                                                                                                                                                                                                                                                                                                                                                                                                                                                                                                                                                                                                                                                                                                                                                                                                                                                                                                                                                                                                                                                                                                                                                                                                                                                                                                                                                                                                                                                                                                                                                                                                                                                                                                                                                                                                                                                                                                                                                                                                                                                                                                                                                                                                                         |                                                                                                                                                                                                                                                                                                                                                                                                                                                                                                                                                                                                                                                                                                                                                                                                                                      |                                                                                      |                                                                                      | 22a                                                                                  |                      |                    |                    |              |                   |                                   |                                                                                      |                                                                                      |                                                                                      |                                                                                      |                                                                                      |                      |                                                                                      |                                                                                      |                                                                                      |                                                                                      |                                                                                      |                                          |                                                                                      |                                                                                      |                                                                                      |                                                                                      |                                                                                      |                           |                                                                                      |                                                                                      |                                                                                      |                                                                                      |                                                                                      |                                             |                                                                                      |                                                                                      |                                                                                      |                                                                                      |                                                                                      |                             |                                                                                      |                                                                                      |                                                                                      |                                                                                      |                                                                                      |                                        |
| 3.1                                         | <p>Below is a list of characteristics that are important for living. How satisfied are you regarding these at your home?</p> <table style="width: 100%; border-collapse: collapse; margin-top: 10px;"> <thead> <tr> <th style="width: 45%;"></th> <th style="width: 10%; text-align: center; font-weight: bold;">not at all satisfied</th> <th style="width: 10%; text-align: center; font-weight: bold;">slightly satisfied</th> <th style="width: 10%; text-align: center; font-weight: bold;">moderately satisf.</th> <th style="width: 10%; text-align: center; font-weight: bold;">very satisf.</th> <th style="width: 10%; text-align: center; font-weight: bold;">extremely satisf.</th> </tr> </thead> <tbody> <tr> <td>♦ living comfort in general —————</td> <td style="text-align: center;"><input style="width: 20px; height: 20px; border: 1px solid black;" type="checkbox"/></td> <td style="text-align: center;"><input style="width: 20px; height: 20px; border: 1px solid black;" type="checkbox"/></td> <td style="text-align: center;"><input style="width: 20px; height: 20px; border: 1px solid black;" type="checkbox"/></td> <td style="text-align: center;"><input style="width: 20px; height: 20px; border: 1px solid black;" type="checkbox"/></td> <td style="text-align: center;"><input style="width: 20px; height: 20px; border: 1px solid black;" type="checkbox"/></td> </tr> <tr> <td>♦ spaciousness —————</td> <td style="text-align: center;"><input style="width: 20px; height: 20px; border: 1px solid black;" type="checkbox"/></td> <td style="text-align: center;"><input style="width: 20px; height: 20px; border: 1px solid black;" type="checkbox"/></td> <td style="text-align: center;"><input style="width: 20px; height: 20px; border: 1px solid black;" type="checkbox"/></td> <td style="text-align: center;"><input style="width: 20px; height: 20px; border: 1px solid black;" type="checkbox"/></td> <td style="text-align: center;"><input style="width: 20px; height: 20px; border: 1px solid black;" type="checkbox"/></td> </tr> <tr> <td>♦ distances to work / schools etc. —————</td> <td style="text-align: center;"><input style="width: 20px; height: 20px; border: 1px solid black;" type="checkbox"/></td> <td style="text-align: center;"><input style="width: 20px; height: 20px; border: 1px solid black;" type="checkbox"/></td> <td style="text-align: center;"><input style="width: 20px; height: 20px; border: 1px solid black;" type="checkbox"/></td> <td style="text-align: center;"><input style="width: 20px; height: 20px; border: 1px solid black;" type="checkbox"/></td> <td style="text-align: center;"><input style="width: 20px; height: 20px; border: 1px solid black;" type="checkbox"/></td> </tr> <tr> <td>♦ exposure to noise —————</td> <td style="text-align: center;"><input style="width: 20px; height: 20px; border: 1px solid black;" type="checkbox"/></td> <td style="text-align: center;"><input style="width: 20px; height: 20px; border: 1px solid black;" type="checkbox"/></td> <td style="text-align: center;"><input style="width: 20px; height: 20px; border: 1px solid black;" type="checkbox"/></td> <td style="text-align: center;"><input style="width: 20px; height: 20px; border: 1px solid black;" type="checkbox"/></td> <td style="text-align: center;"><input style="width: 20px; height: 20px; border: 1px solid black;" type="checkbox"/></td> </tr> <tr> <td>♦ size of balcony, terrace, or garden —————</td> <td style="text-align: center;"><input style="width: 20px; height: 20px; border: 1px solid black;" type="checkbox"/></td> <td style="text-align: center;"><input style="width: 20px; height: 20px; border: 1px solid black;" type="checkbox"/></td> <td style="text-align: center;"><input style="width: 20px; height: 20px; border: 1px solid black;" type="checkbox"/></td> <td style="text-align: center;"><input style="width: 20px; height: 20px; border: 1px solid black;" type="checkbox"/></td> <td style="text-align: center;"><input style="width: 20px; height: 20px; border: 1px solid black;" type="checkbox"/></td> </tr> <tr> <td>♦ lightness, sunshine —————</td> <td style="text-align: center;"><input style="width: 20px; height: 20px; border: 1px solid black;" type="checkbox"/></td> <td style="text-align: center;"><input style="width: 20px; height: 20px; border: 1px solid black;" type="checkbox"/></td> <td style="text-align: center;"><input style="width: 20px; height: 20px; border: 1px solid black;" type="checkbox"/></td> <td style="text-align: center;"><input style="width: 20px; height: 20px; border: 1px solid black;" type="checkbox"/></td> <td style="text-align: center;"><input style="width: 20px; height: 20px; border: 1px solid black;" type="checkbox"/></td> </tr> </tbody> </table> |                                                                                                                                                                                                                                                                                                                                                                                                                                                                                                                                                                                                                                                                                                                                                                                                                                      |                                                                                      |                                                                                      |                                                                                      | not at all satisfied | slightly satisfied | moderately satisf. | very satisf. | extremely satisf. | ♦ living comfort in general ————— | <input style="width: 20px; height: 20px; border: 1px solid black;" type="checkbox"/> | <input style="width: 20px; height: 20px; border: 1px solid black;" type="checkbox"/> | <input style="width: 20px; height: 20px; border: 1px solid black;" type="checkbox"/> | <input style="width: 20px; height: 20px; border: 1px solid black;" type="checkbox"/> | <input style="width: 20px; height: 20px; border: 1px solid black;" type="checkbox"/> | ♦ spaciousness ————— | <input style="width: 20px; height: 20px; border: 1px solid black;" type="checkbox"/> | <input style="width: 20px; height: 20px; border: 1px solid black;" type="checkbox"/> | <input style="width: 20px; height: 20px; border: 1px solid black;" type="checkbox"/> | <input style="width: 20px; height: 20px; border: 1px solid black;" type="checkbox"/> | <input style="width: 20px; height: 20px; border: 1px solid black;" type="checkbox"/> | ♦ distances to work / schools etc. ————— | <input style="width: 20px; height: 20px; border: 1px solid black;" type="checkbox"/> | <input style="width: 20px; height: 20px; border: 1px solid black;" type="checkbox"/> | <input style="width: 20px; height: 20px; border: 1px solid black;" type="checkbox"/> | <input style="width: 20px; height: 20px; border: 1px solid black;" type="checkbox"/> | <input style="width: 20px; height: 20px; border: 1px solid black;" type="checkbox"/> | ♦ exposure to noise ————— | <input style="width: 20px; height: 20px; border: 1px solid black;" type="checkbox"/> | <input style="width: 20px; height: 20px; border: 1px solid black;" type="checkbox"/> | <input style="width: 20px; height: 20px; border: 1px solid black;" type="checkbox"/> | <input style="width: 20px; height: 20px; border: 1px solid black;" type="checkbox"/> | <input style="width: 20px; height: 20px; border: 1px solid black;" type="checkbox"/> | ♦ size of balcony, terrace, or garden ————— | <input style="width: 20px; height: 20px; border: 1px solid black;" type="checkbox"/> | <input style="width: 20px; height: 20px; border: 1px solid black;" type="checkbox"/> | <input style="width: 20px; height: 20px; border: 1px solid black;" type="checkbox"/> | <input style="width: 20px; height: 20px; border: 1px solid black;" type="checkbox"/> | <input style="width: 20px; height: 20px; border: 1px solid black;" type="checkbox"/> | ♦ lightness, sunshine ————— | <input style="width: 20px; height: 20px; border: 1px solid black;" type="checkbox"/> | <input style="width: 20px; height: 20px; border: 1px solid black;" type="checkbox"/> | <input style="width: 20px; height: 20px; border: 1px solid black;" type="checkbox"/> | <input style="width: 20px; height: 20px; border: 1px solid black;" type="checkbox"/> | <input style="width: 20px; height: 20px; border: 1px solid black;" type="checkbox"/> | 23a<br>23b<br>23c<br>23d<br>23e<br>23f |
|                                             | not at all satisfied                                                                                                                                                                                                                                                                                                                                                                                                                                                                                                                                                                                                                                                                                                                                                                                                                                                                                                                                                                                                                                                                                                                                                                                                                                                                                                                                                                                                                                                                                                                                                                                                                                                                                                                                                                                                                                                                                                                                                                                                                                                                                                                                                                                                                                                                                                                                                                                                                                                                                                                                                                                                                                                                                                                                                                                                                                                                                                                                                                                                                                                                                                                                                                                                                                                                                                                                                                                                                                                                                                                                                                                                                                                                                                                                                                                                                                                                                                                                                                                                                                                                                                                                                                                                                                                                                                                                                                                                                                                                                                                                                                                                                                                                                                                                                                                                                                                           | slightly satisfied                                                                                                                                                                                                                                                                                                                                                                                                                                                                                                                                                                                                                                                                                                                                                                                                                   | moderately satisf.                                                                   | very satisf.                                                                         | extremely satisf.                                                                    |                      |                    |                    |              |                   |                                   |                                                                                      |                                                                                      |                                                                                      |                                                                                      |                                                                                      |                      |                                                                                      |                                                                                      |                                                                                      |                                                                                      |                                                                                      |                                          |                                                                                      |                                                                                      |                                                                                      |                                                                                      |                                                                                      |                           |                                                                                      |                                                                                      |                                                                                      |                                                                                      |                                                                                      |                                             |                                                                                      |                                                                                      |                                                                                      |                                                                                      |                                                                                      |                             |                                                                                      |                                                                                      |                                                                                      |                                                                                      |                                                                                      |                                        |
| ♦ living comfort in general —————           | <input style="width: 20px; height: 20px; border: 1px solid black;" type="checkbox"/>                                                                                                                                                                                                                                                                                                                                                                                                                                                                                                                                                                                                                                                                                                                                                                                                                                                                                                                                                                                                                                                                                                                                                                                                                                                                                                                                                                                                                                                                                                                                                                                                                                                                                                                                                                                                                                                                                                                                                                                                                                                                                                                                                                                                                                                                                                                                                                                                                                                                                                                                                                                                                                                                                                                                                                                                                                                                                                                                                                                                                                                                                                                                                                                                                                                                                                                                                                                                                                                                                                                                                                                                                                                                                                                                                                                                                                                                                                                                                                                                                                                                                                                                                                                                                                                                                                                                                                                                                                                                                                                                                                                                                                                                                                                                                                                           | <input style="width: 20px; height: 20px; border: 1px solid black;" type="checkbox"/>                                                                                                                                                                                                                                                                                                                                                                                                                                                                                                                                                                                                                                                                                                                                                 | <input style="width: 20px; height: 20px; border: 1px solid black;" type="checkbox"/> | <input style="width: 20px; height: 20px; border: 1px solid black;" type="checkbox"/> | <input style="width: 20px; height: 20px; border: 1px solid black;" type="checkbox"/> |                      |                    |                    |              |                   |                                   |                                                                                      |                                                                                      |                                                                                      |                                                                                      |                                                                                      |                      |                                                                                      |                                                                                      |                                                                                      |                                                                                      |                                                                                      |                                          |                                                                                      |                                                                                      |                                                                                      |                                                                                      |                                                                                      |                           |                                                                                      |                                                                                      |                                                                                      |                                                                                      |                                                                                      |                                             |                                                                                      |                                                                                      |                                                                                      |                                                                                      |                                                                                      |                             |                                                                                      |                                                                                      |                                                                                      |                                                                                      |                                                                                      |                                        |
| ♦ spaciousness —————                        | <input style="width: 20px; height: 20px; border: 1px solid black;" type="checkbox"/>                                                                                                                                                                                                                                                                                                                                                                                                                                                                                                                                                                                                                                                                                                                                                                                                                                                                                                                                                                                                                                                                                                                                                                                                                                                                                                                                                                                                                                                                                                                                                                                                                                                                                                                                                                                                                                                                                                                                                                                                                                                                                                                                                                                                                                                                                                                                                                                                                                                                                                                                                                                                                                                                                                                                                                                                                                                                                                                                                                                                                                                                                                                                                                                                                                                                                                                                                                                                                                                                                                                                                                                                                                                                                                                                                                                                                                                                                                                                                                                                                                                                                                                                                                                                                                                                                                                                                                                                                                                                                                                                                                                                                                                                                                                                                                                           | <input style="width: 20px; height: 20px; border: 1px solid black;" type="checkbox"/>                                                                                                                                                                                                                                                                                                                                                                                                                                                                                                                                                                                                                                                                                                                                                 | <input style="width: 20px; height: 20px; border: 1px solid black;" type="checkbox"/> | <input style="width: 20px; height: 20px; border: 1px solid black;" type="checkbox"/> | <input style="width: 20px; height: 20px; border: 1px solid black;" type="checkbox"/> |                      |                    |                    |              |                   |                                   |                                                                                      |                                                                                      |                                                                                      |                                                                                      |                                                                                      |                      |                                                                                      |                                                                                      |                                                                                      |                                                                                      |                                                                                      |                                          |                                                                                      |                                                                                      |                                                                                      |                                                                                      |                                                                                      |                           |                                                                                      |                                                                                      |                                                                                      |                                                                                      |                                                                                      |                                             |                                                                                      |                                                                                      |                                                                                      |                                                                                      |                                                                                      |                             |                                                                                      |                                                                                      |                                                                                      |                                                                                      |                                                                                      |                                        |
| ♦ distances to work / schools etc. —————    | <input style="width: 20px; height: 20px; border: 1px solid black;" type="checkbox"/>                                                                                                                                                                                                                                                                                                                                                                                                                                                                                                                                                                                                                                                                                                                                                                                                                                                                                                                                                                                                                                                                                                                                                                                                                                                                                                                                                                                                                                                                                                                                                                                                                                                                                                                                                                                                                                                                                                                                                                                                                                                                                                                                                                                                                                                                                                                                                                                                                                                                                                                                                                                                                                                                                                                                                                                                                                                                                                                                                                                                                                                                                                                                                                                                                                                                                                                                                                                                                                                                                                                                                                                                                                                                                                                                                                                                                                                                                                                                                                                                                                                                                                                                                                                                                                                                                                                                                                                                                                                                                                                                                                                                                                                                                                                                                                                           | <input style="width: 20px; height: 20px; border: 1px solid black;" type="checkbox"/>                                                                                                                                                                                                                                                                                                                                                                                                                                                                                                                                                                                                                                                                                                                                                 | <input style="width: 20px; height: 20px; border: 1px solid black;" type="checkbox"/> | <input style="width: 20px; height: 20px; border: 1px solid black;" type="checkbox"/> | <input style="width: 20px; height: 20px; border: 1px solid black;" type="checkbox"/> |                      |                    |                    |              |                   |                                   |                                                                                      |                                                                                      |                                                                                      |                                                                                      |                                                                                      |                      |                                                                                      |                                                                                      |                                                                                      |                                                                                      |                                                                                      |                                          |                                                                                      |                                                                                      |                                                                                      |                                                                                      |                                                                                      |                           |                                                                                      |                                                                                      |                                                                                      |                                                                                      |                                                                                      |                                             |                                                                                      |                                                                                      |                                                                                      |                                                                                      |                                                                                      |                             |                                                                                      |                                                                                      |                                                                                      |                                                                                      |                                                                                      |                                        |
| ♦ exposure to noise —————                   | <input style="width: 20px; height: 20px; border: 1px solid black;" type="checkbox"/>                                                                                                                                                                                                                                                                                                                                                                                                                                                                                                                                                                                                                                                                                                                                                                                                                                                                                                                                                                                                                                                                                                                                                                                                                                                                                                                                                                                                                                                                                                                                                                                                                                                                                                                                                                                                                                                                                                                                                                                                                                                                                                                                                                                                                                                                                                                                                                                                                                                                                                                                                                                                                                                                                                                                                                                                                                                                                                                                                                                                                                                                                                                                                                                                                                                                                                                                                                                                                                                                                                                                                                                                                                                                                                                                                                                                                                                                                                                                                                                                                                                                                                                                                                                                                                                                                                                                                                                                                                                                                                                                                                                                                                                                                                                                                                                           | <input style="width: 20px; height: 20px; border: 1px solid black;" type="checkbox"/>                                                                                                                                                                                                                                                                                                                                                                                                                                                                                                                                                                                                                                                                                                                                                 | <input style="width: 20px; height: 20px; border: 1px solid black;" type="checkbox"/> | <input style="width: 20px; height: 20px; border: 1px solid black;" type="checkbox"/> | <input style="width: 20px; height: 20px; border: 1px solid black;" type="checkbox"/> |                      |                    |                    |              |                   |                                   |                                                                                      |                                                                                      |                                                                                      |                                                                                      |                                                                                      |                      |                                                                                      |                                                                                      |                                                                                      |                                                                                      |                                                                                      |                                          |                                                                                      |                                                                                      |                                                                                      |                                                                                      |                                                                                      |                           |                                                                                      |                                                                                      |                                                                                      |                                                                                      |                                                                                      |                                             |                                                                                      |                                                                                      |                                                                                      |                                                                                      |                                                                                      |                             |                                                                                      |                                                                                      |                                                                                      |                                                                                      |                                                                                      |                                        |
| ♦ size of balcony, terrace, or garden ————— | <input style="width: 20px; height: 20px; border: 1px solid black;" type="checkbox"/>                                                                                                                                                                                                                                                                                                                                                                                                                                                                                                                                                                                                                                                                                                                                                                                                                                                                                                                                                                                                                                                                                                                                                                                                                                                                                                                                                                                                                                                                                                                                                                                                                                                                                                                                                                                                                                                                                                                                                                                                                                                                                                                                                                                                                                                                                                                                                                                                                                                                                                                                                                                                                                                                                                                                                                                                                                                                                                                                                                                                                                                                                                                                                                                                                                                                                                                                                                                                                                                                                                                                                                                                                                                                                                                                                                                                                                                                                                                                                                                                                                                                                                                                                                                                                                                                                                                                                                                                                                                                                                                                                                                                                                                                                                                                                                                           | <input style="width: 20px; height: 20px; border: 1px solid black;" type="checkbox"/>                                                                                                                                                                                                                                                                                                                                                                                                                                                                                                                                                                                                                                                                                                                                                 | <input style="width: 20px; height: 20px; border: 1px solid black;" type="checkbox"/> | <input style="width: 20px; height: 20px; border: 1px solid black;" type="checkbox"/> | <input style="width: 20px; height: 20px; border: 1px solid black;" type="checkbox"/> |                      |                    |                    |              |                   |                                   |                                                                                      |                                                                                      |                                                                                      |                                                                                      |                                                                                      |                      |                                                                                      |                                                                                      |                                                                                      |                                                                                      |                                                                                      |                                          |                                                                                      |                                                                                      |                                                                                      |                                                                                      |                                                                                      |                           |                                                                                      |                                                                                      |                                                                                      |                                                                                      |                                                                                      |                                             |                                                                                      |                                                                                      |                                                                                      |                                                                                      |                                                                                      |                             |                                                                                      |                                                                                      |                                                                                      |                                                                                      |                                                                                      |                                        |
| ♦ lightness, sunshine —————                 | <input style="width: 20px; height: 20px; border: 1px solid black;" type="checkbox"/>                                                                                                                                                                                                                                                                                                                                                                                                                                                                                                                                                                                                                                                                                                                                                                                                                                                                                                                                                                                                                                                                                                                                                                                                                                                                                                                                                                                                                                                                                                                                                                                                                                                                                                                                                                                                                                                                                                                                                                                                                                                                                                                                                                                                                                                                                                                                                                                                                                                                                                                                                                                                                                                                                                                                                                                                                                                                                                                                                                                                                                                                                                                                                                                                                                                                                                                                                                                                                                                                                                                                                                                                                                                                                                                                                                                                                                                                                                                                                                                                                                                                                                                                                                                                                                                                                                                                                                                                                                                                                                                                                                                                                                                                                                                                                                                           | <input style="width: 20px; height: 20px; border: 1px solid black;" type="checkbox"/>                                                                                                                                                                                                                                                                                                                                                                                                                                                                                                                                                                                                                                                                                                                                                 | <input style="width: 20px; height: 20px; border: 1px solid black;" type="checkbox"/> | <input style="width: 20px; height: 20px; border: 1px solid black;" type="checkbox"/> | <input style="width: 20px; height: 20px; border: 1px solid black;" type="checkbox"/> |                      |                    |                    |              |                   |                                   |                                                                                      |                                                                                      |                                                                                      |                                                                                      |                                                                                      |                      |                                                                                      |                                                                                      |                                                                                      |                                                                                      |                                                                                      |                                          |                                                                                      |                                                                                      |                                                                                      |                                                                                      |                                                                                      |                           |                                                                                      |                                                                                      |                                                                                      |                                                                                      |                                                                                      |                                             |                                                                                      |                                                                                      |                                                                                      |                                                                                      |                                                                                      |                             |                                                                                      |                                                                                      |                                                                                      |                                                                                      |                                                                                      |                                        |
| 3.2                                         | <p>Is there anything in your home that bothers or disturbs you in particular?</p> <p><input style="width: 20px; height: 20px; border: 1px solid black;" type="checkbox"/> no   <input style="width: 20px; height: 20px; border: 1px solid black;" type="checkbox"/> yes, that is? .....</p> <p>.....</p>                                                                                                                                                                                                                                                                                                                                                                                                                                                                                                                                                                                                                                                                                                                                                                                                                                                                                                                                                                                                                                                                                                                                                                                                                                                                                                                                                                                                                                                                                                                                                                                                                                                                                                                                                                                                                                                                                                                                                                                                                                                                                                                                                                                                                                                                                                                                                                                                                                                                                                                                                                                                                                                                                                                                                                                                                                                                                                                                                                                                                                                                                                                                                                                                                                                                                                                                                                                                                                                                                                                                                                                                                                                                                                                                                                                                                                                                                                                                                                                                                                                                                                                                                                                                                                                                                                                                                                                                                                                                                                                                                                       |                                                                                                                                                                                                                                                                                                                                                                                                                                                                                                                                                                                                                                                                                                                                                                                                                                      |                                                                                      |                                                                                      | 24a                                                                                  |                      |                    |                    |              |                   |                                   |                                                                                      |                                                                                      |                                                                                      |                                                                                      |                                                                                      |                      |                                                                                      |                                                                                      |                                                                                      |                                                                                      |                                                                                      |                                          |                                                                                      |                                                                                      |                                                                                      |                                                                                      |                                                                                      |                           |                                                                                      |                                                                                      |                                                                                      |                                                                                      |                                                                                      |                                             |                                                                                      |                                                                                      |                                                                                      |                                                                                      |                                                                                      |                             |                                                                                      |                                                                                      |                                                                                      |                                                                                      |                                                                                      |                                        |

| <p>3.3 How often are you disturbed by road traffic noise in the following activities?</p> <table border="0"> <thead> <tr> <th></th> <th>never</th> <th>rarely</th> <th>some-<br/>times</th> <th>often</th> <th>always</th> <th></th> </tr> </thead> <tbody> <tr> <td>♦ Disturbs conversations, phone calls etc. _____</td> <td><input type="checkbox"/></td> <td><input type="checkbox"/></td> <td><input type="checkbox"/></td> <td><input type="checkbox"/></td> <td><input type="checkbox"/></td> <td>25a</td> </tr> <tr> <td>♦ Disturbs listening to the radio, watching TV _____</td> <td><input type="checkbox"/></td> <td><input type="checkbox"/></td> <td><input type="checkbox"/></td> <td><input type="checkbox"/></td> <td><input type="checkbox"/></td> <td>25b</td> </tr> <tr> <td>♦ Disturbs recreation outdoors _____</td> <td><input type="checkbox"/></td> <td><input type="checkbox"/></td> <td><input type="checkbox"/></td> <td><input type="checkbox"/></td> <td><input type="checkbox"/></td> <td>25c</td> </tr> <tr> <td>♦ Disturbs reading, thinking, concentration _____</td> <td><input type="checkbox"/></td> <td><input type="checkbox"/></td> <td><input type="checkbox"/></td> <td><input type="checkbox"/></td> <td><input type="checkbox"/></td> <td>25d</td> </tr> <tr> <td>♦ Disturbs sociability, e.g. with guests _____</td> <td><input type="checkbox"/></td> <td><input type="checkbox"/></td> <td><input type="checkbox"/></td> <td><input type="checkbox"/></td> <td><input type="checkbox"/></td> <td>25e</td> </tr> <tr> <td>♦ Disturbs at night, when I want to sleep _____</td> <td><input type="checkbox"/></td> <td><input type="checkbox"/></td> <td><input type="checkbox"/></td> <td><input type="checkbox"/></td> <td><input type="checkbox"/></td> <td>25f</td> </tr> </tbody> </table> |                                                                                         | never                    | rarely                   | some-<br>times           | often                        | always |   | ♦ Disturbs conversations, phone calls etc. _____ | <input type="checkbox"/> | <input type="checkbox"/> | <input type="checkbox"/> | <input type="checkbox"/>      | <input type="checkbox"/> | 25a | ♦ Disturbs listening to the radio, watching TV _____ | <input type="checkbox"/> | <input type="checkbox"/>     | <input type="checkbox"/> | <input type="checkbox"/> | <input type="checkbox"/> | 25b | ♦ Disturbs recreation outdoors _____ | <input type="checkbox"/> | 25c | ♦ Disturbs reading, thinking, concentration _____ | <input type="checkbox"/> | 25d | ♦ Disturbs sociability, e.g. with guests _____ | <input type="checkbox"/> | 25e | ♦ Disturbs at night, when I want to sleep _____ | <input type="checkbox"/> | 25f |  |
|---------------------------------------------------------------------------------------------------------------------------------------------------------------------------------------------------------------------------------------------------------------------------------------------------------------------------------------------------------------------------------------------------------------------------------------------------------------------------------------------------------------------------------------------------------------------------------------------------------------------------------------------------------------------------------------------------------------------------------------------------------------------------------------------------------------------------------------------------------------------------------------------------------------------------------------------------------------------------------------------------------------------------------------------------------------------------------------------------------------------------------------------------------------------------------------------------------------------------------------------------------------------------------------------------------------------------------------------------------------------------------------------------------------------------------------------------------------------------------------------------------------------------------------------------------------------------------------------------------------------------------------------------------------------------------------------------------------------------------------------------------------------------------------------------------------------------------------------|-----------------------------------------------------------------------------------------|--------------------------|--------------------------|--------------------------|------------------------------|--------|---|--------------------------------------------------|--------------------------|--------------------------|--------------------------|-------------------------------|--------------------------|-----|------------------------------------------------------|--------------------------|------------------------------|--------------------------|--------------------------|--------------------------|-----|--------------------------------------|--------------------------|--------------------------|--------------------------|--------------------------|--------------------------|-----|---------------------------------------------------|--------------------------|--------------------------|--------------------------|--------------------------|--------------------------|-----|------------------------------------------------|--------------------------|--------------------------|--------------------------|--------------------------|--------------------------|-----|-------------------------------------------------|--------------------------|--------------------------|--------------------------|--------------------------|--------------------------|-----|--|
|                                                                                                                                                                                                                                                                                                                                                                                                                                                                                                                                                                                                                                                                                                                                                                                                                                                                                                                                                                                                                                                                                                                                                                                                                                                                                                                                                                                                                                                                                                                                                                                                                                                                                                                                                                                                                                             | never                                                                                   | rarely                   | some-<br>times           | often                    | always                       |        |   |                                                  |                          |                          |                          |                               |                          |     |                                                      |                          |                              |                          |                          |                          |     |                                      |                          |                          |                          |                          |                          |     |                                                   |                          |                          |                          |                          |                          |     |                                                |                          |                          |                          |                          |                          |     |                                                 |                          |                          |                          |                          |                          |     |  |
| ♦ Disturbs conversations, phone calls etc. _____                                                                                                                                                                                                                                                                                                                                                                                                                                                                                                                                                                                                                                                                                                                                                                                                                                                                                                                                                                                                                                                                                                                                                                                                                                                                                                                                                                                                                                                                                                                                                                                                                                                                                                                                                                                            | <input type="checkbox"/>                                                                | <input type="checkbox"/> | <input type="checkbox"/> | <input type="checkbox"/> | <input type="checkbox"/>     | 25a    |   |                                                  |                          |                          |                          |                               |                          |     |                                                      |                          |                              |                          |                          |                          |     |                                      |                          |                          |                          |                          |                          |     |                                                   |                          |                          |                          |                          |                          |     |                                                |                          |                          |                          |                          |                          |     |                                                 |                          |                          |                          |                          |                          |     |  |
| ♦ Disturbs listening to the radio, watching TV _____                                                                                                                                                                                                                                                                                                                                                                                                                                                                                                                                                                                                                                                                                                                                                                                                                                                                                                                                                                                                                                                                                                                                                                                                                                                                                                                                                                                                                                                                                                                                                                                                                                                                                                                                                                                        | <input type="checkbox"/>                                                                | <input type="checkbox"/> | <input type="checkbox"/> | <input type="checkbox"/> | <input type="checkbox"/>     | 25b    |   |                                                  |                          |                          |                          |                               |                          |     |                                                      |                          |                              |                          |                          |                          |     |                                      |                          |                          |                          |                          |                          |     |                                                   |                          |                          |                          |                          |                          |     |                                                |                          |                          |                          |                          |                          |     |                                                 |                          |                          |                          |                          |                          |     |  |
| ♦ Disturbs recreation outdoors _____                                                                                                                                                                                                                                                                                                                                                                                                                                                                                                                                                                                                                                                                                                                                                                                                                                                                                                                                                                                                                                                                                                                                                                                                                                                                                                                                                                                                                                                                                                                                                                                                                                                                                                                                                                                                        | <input type="checkbox"/>                                                                | <input type="checkbox"/> | <input type="checkbox"/> | <input type="checkbox"/> | <input type="checkbox"/>     | 25c    |   |                                                  |                          |                          |                          |                               |                          |     |                                                      |                          |                              |                          |                          |                          |     |                                      |                          |                          |                          |                          |                          |     |                                                   |                          |                          |                          |                          |                          |     |                                                |                          |                          |                          |                          |                          |     |                                                 |                          |                          |                          |                          |                          |     |  |
| ♦ Disturbs reading, thinking, concentration _____                                                                                                                                                                                                                                                                                                                                                                                                                                                                                                                                                                                                                                                                                                                                                                                                                                                                                                                                                                                                                                                                                                                                                                                                                                                                                                                                                                                                                                                                                                                                                                                                                                                                                                                                                                                           | <input type="checkbox"/>                                                                | <input type="checkbox"/> | <input type="checkbox"/> | <input type="checkbox"/> | <input type="checkbox"/>     | 25d    |   |                                                  |                          |                          |                          |                               |                          |     |                                                      |                          |                              |                          |                          |                          |     |                                      |                          |                          |                          |                          |                          |     |                                                   |                          |                          |                          |                          |                          |     |                                                |                          |                          |                          |                          |                          |     |                                                 |                          |                          |                          |                          |                          |     |  |
| ♦ Disturbs sociability, e.g. with guests _____                                                                                                                                                                                                                                                                                                                                                                                                                                                                                                                                                                                                                                                                                                                                                                                                                                                                                                                                                                                                                                                                                                                                                                                                                                                                                                                                                                                                                                                                                                                                                                                                                                                                                                                                                                                              | <input type="checkbox"/>                                                                | <input type="checkbox"/> | <input type="checkbox"/> | <input type="checkbox"/> | <input type="checkbox"/>     | 25e    |   |                                                  |                          |                          |                          |                               |                          |     |                                                      |                          |                              |                          |                          |                          |     |                                      |                          |                          |                          |                          |                          |     |                                                   |                          |                          |                          |                          |                          |     |                                                |                          |                          |                          |                          |                          |     |                                                 |                          |                          |                          |                          |                          |     |  |
| ♦ Disturbs at night, when I want to sleep _____                                                                                                                                                                                                                                                                                                                                                                                                                                                                                                                                                                                                                                                                                                                                                                                                                                                                                                                                                                                                                                                                                                                                                                                                                                                                                                                                                                                                                                                                                                                                                                                                                                                                                                                                                                                             | <input type="checkbox"/>                                                                | <input type="checkbox"/> | <input type="checkbox"/> | <input type="checkbox"/> | <input type="checkbox"/>     | 25f    |   |                                                  |                          |                          |                          |                               |                          |     |                                                      |                          |                              |                          |                          |                          |     |                                      |                          |                          |                          |                          |                          |     |                                                   |                          |                          |                          |                          |                          |     |                                                |                          |                          |                          |                          |                          |     |                                                 |                          |                          |                          |                          |                          |     |  |
| <p>3.4 By which kind of vehicles are you disturbed or annoyed in particular?<br/> <input type="checkbox"/> none    <input type="checkbox"/> cars    <input type="checkbox"/> trucks, delivery vehicles    <input type="checkbox"/> motorcycles    <input type="checkbox"/> trams/buses</p>                                                                                                                                                                                                                                                                                                                                                                                                                                                                                                                                                                                                                                                                                                                                                                                                                                                                                                                                                                                                                                                                                                                                                                                                                                                                                                                                                                                                                                                                                                                                                  | 26a                                                                                     |                          |                          |                          |                              |        |   |                                                  |                          |                          |                          |                               |                          |     |                                                      |                          |                              |                          |                          |                          |     |                                      |                          |                          |                          |                          |                          |     |                                                   |                          |                          |                          |                          |                          |     |                                                |                          |                          |                          |                          |                          |     |                                                 |                          |                          |                          |                          |                          |     |  |
| <p>3.5 Are you particularly disturbed or annoyed by road traffic noise at certain times (night or day)?</p> <p><input type="checkbox"/> no</p> <p><input type="checkbox"/> yes, from ____ : ____ to ____ : ____ o'clock</p> <p>and from ____ : ____ to ____ : ____ o'clock</p> <p>and from ____ : ____ to ____ : ____ o'clock</p>                                                                                                                                                                                                                                                                                                                                                                                                                                                                                                                                                                                                                                                                                                                                                                                                                                                                                                                                                                                                                                                                                                                                                                                                                                                                                                                                                                                                                                                                                                           | <p>27a</p> <p>27b</p> <p>27c</p>                                                        |                          |                          |                          |                              |        |   |                                                  |                          |                          |                          |                               |                          |     |                                                      |                          |                              |                          |                          |                          |     |                                      |                          |                          |                          |                          |                          |     |                                                   |                          |                          |                          |                          |                          |     |                                                |                          |                          |                          |                          |                          |     |                                                 |                          |                          |                          |                          |                          |     |  |
| <p>4.1 Please indicate how noise sensitive you are in general. Are you...</p> <table border="0"> <tr> <td>0</td><td>1</td><td>2</td><td>3</td><td>4</td><td>5</td><td>6</td><td>7</td><td>8</td><td>9</td><td>10</td> </tr> <tr> <td colspan="5">not at all<br/>noise sensitive</td> <td colspan="6">extremely<br/>noise sensitive</td> </tr> </table>                                                                                                                                                                                                                                                                                                                                                                                                                                                                                                                                                                                                                                                                                                                                                                                                                                                                                                                                                                                                                                                                                                                                                                                                                                                                                                                                                                                                                                                                                      | 0                                                                                       | 1                        | 2                        | 3                        | 4                            | 5      | 6 | 7                                                | 8                        | 9                        | 10                       | not at all<br>noise sensitive |                          |     |                                                      |                          | extremely<br>noise sensitive |                          |                          |                          |     |                                      | 31a                      |                          |                          |                          |                          |     |                                                   |                          |                          |                          |                          |                          |     |                                                |                          |                          |                          |                          |                          |     |                                                 |                          |                          |                          |                          |                          |     |  |
| 0                                                                                                                                                                                                                                                                                                                                                                                                                                                                                                                                                                                                                                                                                                                                                                                                                                                                                                                                                                                                                                                                                                                                                                                                                                                                                                                                                                                                                                                                                                                                                                                                                                                                                                                                                                                                                                           | 1                                                                                       | 2                        | 3                        | 4                        | 5                            | 6      | 7 | 8                                                | 9                        | 10                       |                          |                               |                          |     |                                                      |                          |                              |                          |                          |                          |     |                                      |                          |                          |                          |                          |                          |     |                                                   |                          |                          |                          |                          |                          |     |                                                |                          |                          |                          |                          |                          |     |                                                 |                          |                          |                          |                          |                          |     |  |
| not at all<br>noise sensitive                                                                                                                                                                                                                                                                                                                                                                                                                                                                                                                                                                                                                                                                                                                                                                                                                                                                                                                                                                                                                                                                                                                                                                                                                                                                                                                                                                                                                                                                                                                                                                                                                                                                                                                                                                                                               |                                                                                         |                          |                          |                          | extremely<br>noise sensitive |        |   |                                                  |                          |                          |                          |                               |                          |     |                                                      |                          |                              |                          |                          |                          |     |                                      |                          |                          |                          |                          |                          |     |                                                   |                          |                          |                          |                          |                          |     |                                                |                          |                          |                          |                          |                          |     |                                                 |                          |                          |                          |                          |                          |     |  |
| <p>5.1 The following questions pertain to your sleeping habits. What is the orientation of your bedroom towards the nearest street?</p> <p><input type="checkbox"/> away from street    <input type="checkbox"/> perpendicular to street    <input type="checkbox"/> pointing towards street</p>                                                                                                                                                                                                                                                                                                                                                                                                                                                                                                                                                                                                                                                                                                                                                                                                                                                                                                                                                                                                                                                                                                                                                                                                                                                                                                                                                                                                                                                                                                                                            | 41a                                                                                     |                          |                          |                          |                              |        |   |                                                  |                          |                          |                          |                               |                          |     |                                                      |                          |                              |                          |                          |                          |     |                                      |                          |                          |                          |                          |                          |     |                                                   |                          |                          |                          |                          |                          |     |                                                |                          |                          |                          |                          |                          |     |                                                 |                          |                          |                          |                          |                          |     |  |
| <p>5.2 Do you have mechanical ventilation (with heat recovery) in your home:</p> <p><input type="checkbox"/> yes    <input type="checkbox"/> no    <input type="checkbox"/> don't know</p>                                                                                                                                                                                                                                                                                                                                                                                                                                                                                                                                                                                                                                                                                                                                                                                                                                                                                                                                                                                                                                                                                                                                                                                                                                                                                                                                                                                                                                                                                                                                                                                                                                                  | 42a                                                                                     |                          |                          |                          |                              |        |   |                                                  |                          |                          |                          |                               |                          |     |                                                      |                          |                              |                          |                          |                          |     |                                      |                          |                          |                          |                          |                          |     |                                                   |                          |                          |                          |                          |                          |     |                                                |                          |                          |                          |                          |                          |     |                                                 |                          |                          |                          |                          |                          |     |  |
| <p>5.3 In which position do you keep your bedroom windows usually?</p> <p>♦ in summer: <input type="checkbox"/> closed    <input type="checkbox"/> open or half-open</p> <p>♦ in winter: <input type="checkbox"/> closed    <input type="checkbox"/> open or half-open</p> <p>if open during summer, why?    <input type="checkbox"/> fresh air supply    <input type="checkbox"/> cooling    <input type="checkbox"/> other</p> <p>if closed during summer, why?    <input type="checkbox"/> noise (from outside)    <input type="checkbox"/> heat loss    <input type="checkbox"/> other</p> <p>if open during winter, why?    <input type="checkbox"/> fresh air supply    <input type="checkbox"/> cooling    <input type="checkbox"/> other</p> <p>if closed during winter, why?    <input type="checkbox"/> noise (from outside)    <input type="checkbox"/> heat loss    <input type="checkbox"/> other</p> <p>If it would be totally calm outside (regardless of source) which window position would you prefer?</p> <p>♦ in summer: <input type="checkbox"/> closed    <input type="checkbox"/> open/half-open</p> <p>♦ in winter: <input type="checkbox"/> closed    <input type="checkbox"/> open/half-open</p>                                                                                                                                                                                                                                                                                                                                                                                                                                                                                                                                                                                                                  | <p>43a</p> <p>43b</p> <p>43c</p> <p>43d</p> <p>43e</p> <p>43f</p> <p>43g</p> <p>43h</p> |                          |                          |                          |                              |        |   |                                                  |                          |                          |                          |                               |                          |     |                                                      |                          |                              |                          |                          |                          |     |                                      |                          |                          |                          |                          |                          |     |                                                   |                          |                          |                          |                          |                          |     |                                                |                          |                          |                          |                          |                          |     |                                                 |                          |                          |                          |                          |                          |     |  |
| <p>5.4 How often do you use earplugs (e.g. Oropax) for sleeping?</p> <p>never    rarely    sometimes    often    always</p> <p><input type="checkbox"/> — <input type="checkbox"/> — <input type="checkbox"/> — <input type="checkbox"/> — <input type="checkbox"/></p> <p>If you use them, why?</p> <p><input type="checkbox"/> because of noise from outside the house</p> <p><input type="checkbox"/> because of noise from inside the house</p> <p><input type="checkbox"/> because of noise from within sleeping room (e.g. snoring)</p>                                                                                                                                                                                                                                                                                                                                                                                                                                                                                                                                                                                                                                                                                                                                                                                                                                                                                                                                                                                                                                                                                                                                                                                                                                                                                               | <p>44a</p> <p>44b</p> <p>44c</p> <p>44d</p>                                             |                          |                          |                          |                              |        |   |                                                  |                          |                          |                          |                               |                          |     |                                                      |                          |                              |                          |                          |                          |     |                                      |                          |                          |                          |                          |                          |     |                                                   |                          |                          |                          |                          |                          |     |                                                |                          |                          |                          |                          |                          |     |                                                 |                          |                          |                          |                          |                          |     |  |
| <p>6.1 Today's date: .....</p>                                                                                                                                                                                                                                                                                                                                                                                                                                                                                                                                                                                                                                                                                                                                                                                                                                                                                                                                                                                                                                                                                                                                                                                                                                                                                                                                                                                                                                                                                                                                                                                                                                                                                                                                                                                                              | <p>😊 Thank you for your cooperation! 😊</p>                                              |                          |                          |                          |                              |        |   |                                                  |                          |                          |                          |                               |                          |     |                                                      |                          |                              |                          |                          |                          |     |                                      |                          |                          |                          |                          |                          |     |                                                   |                          |                          |                          |                          |                          |     |                                                |                          |                          |                          |                          |                          |     |                                                 |                          |                          |                          |                          |                          |     |  |
