# Supplementary material for: Effects of Scale, Question Location, Order of Response Alternatives, and Season on Self-Reported Noise Annoyance Using ICBEN Scales: A Field Experiment
Source: MDPI journal article supplement (doi:10.3390/ijerph13111163), 2016-11-23
Supplement: s1 [file s1]

# Kurz-Umfrage • Lärm im Wohnumfeld •

«H» «PersID»

Bitte beantworten Sie die einzelnen Fragen der Reihe nach. Kreuzen Sie jeweils die Antwort an, die auf Sie am ehesten zutrifft. Falls mehrere Antworten zutreffen, kreuzen Sie alle zutreffenden an. Besten Dank.

## Allgemeine Angaben

|     |                                                                                                                                                                                                                                |                 |            |
|-----|--------------------------------------------------------------------------------------------------------------------------------------------------------------------------------------------------------------------------------|-----------------|------------|
| 1.1 | Geschlecht: <input type="checkbox"/> weiblich <input type="checkbox"/> männlich                                                                                                                                                | Jahrgang: ..... | 11ab       |
| 1.2 | Ist die Adresse im Begleitbrief der Ort, wo Sie normalerweise wohnen? <input type="checkbox"/> ja <input type="checkbox"/> nein                                                                                                |                 | 12a        |
| 1.3 | Wie lange wohnen Sie schon in Ihrer jetzigen Wohnung/Haus? .....                                                                                                                                                               | Jahre           | 13a        |
| 1.4 | Wohnen Sie: <input type="checkbox"/> alleine <input type="checkbox"/> in einer Familie/als Paar <input type="checkbox"/> in einer WG <input type="checkbox"/> anderes                                                          |                 | 14a        |
| 1.5 | In welcher Art Wohnung/Haus wohnen Sie? <input type="checkbox"/> Reihenhaushaus <input type="checkbox"/> Einfamilienhaus<br><input type="checkbox"/> Wohnung im Erdgeschoss<br><input type="checkbox"/> Wohnung im ..... Stock |                 | 15a<br>15b |
| 1.6 | Sind Sie Eigentümer/in oder Mieter/in Ihrer Wohnung oder Ihres Hauses?<br><input type="checkbox"/> Eigentümer/in <input type="checkbox"/> Mieter/in oder Untermieter/in                                                        |                 | 16a        |

## Angaben zum Wohnen und zum Lärm

|     |                                                                                                                                                                                                                                                                           |                                                                                                                              |
|-----|---------------------------------------------------------------------------------------------------------------------------------------------------------------------------------------------------------------------------------------------------------------------------|------------------------------------------------------------------------------------------------------------------------------|
| 2.1 | Es folgen einige Eigenschaften, die für das Wohnen wichtig sind. Wie zufrieden sind Sie damit bei Ihnen zu Hause?                                                                                                                                                         |                                                                                                                              |
|     |                                                                                                                                                                                                                                                                           | sehr zufrieden    ziemlich zufried.    mittel-mässig    wenig zufried.    nicht zufried.                                     |
| ♦   | Komfort allgemein                                                                                                                                                                                                                                                         | <input type="checkbox"/> <input type="checkbox"/> <input type="checkbox"/> <input type="checkbox"/> <input type="checkbox"/> |
| ♦   | Vorhandener Platz, Geräumigkeit                                                                                                                                                                                                                                           | <input type="checkbox"/> <input type="checkbox"/> <input type="checkbox"/> <input type="checkbox"/> <input type="checkbox"/> |
| ♦   | Distanz zur Arbeit, Schule etc.                                                                                                                                                                                                                                           | <input type="checkbox"/> <input type="checkbox"/> <input type="checkbox"/> <input type="checkbox"/> <input type="checkbox"/> |
| ♦   | Belastungen durch Lärm                                                                                                                                                                                                                                                    | <input type="checkbox"/> <input type="checkbox"/> <input type="checkbox"/> <input type="checkbox"/> <input type="checkbox"/> |
| ♦   | Grösse von Balkon, Sitzplatz oder Garten                                                                                                                                                                                                                                  | <input type="checkbox"/> <input type="checkbox"/> <input type="checkbox"/> <input type="checkbox"/> <input type="checkbox"/> |
| ♦   | Licht und Sonne                                                                                                                                                                                                                                                           | <input type="checkbox"/> <input type="checkbox"/> <input type="checkbox"/> <input type="checkbox"/> <input type="checkbox"/> |
| 2.2 | Gibt es in Ihrer Wohnung / Ihrem Haus irgendwelche Dinge, die Sie besonders stören?<br><input type="checkbox"/> nein <input type="checkbox"/> ja, welche? .....                                                                                                           | 23a<br>23b<br>23c<br>23d<br>23e<br>23f                                                                                       |
| 2.3 | Wie oft treten bei Ihnen folgende Störungen als Folge von Strassenlärm auf?                                                                                                                                                                                               |                                                                                                                              |
|     |                                                                                                                                                                                                                                                                           | immer    oft    gelegentlich    selten    nie                                                                                |
| ♦   | Stört bei Unterhaltungen, beim Telefonieren                                                                                                                                                                                                                               | <input type="checkbox"/> <input type="checkbox"/> <input type="checkbox"/> <input type="checkbox"/> <input type="checkbox"/> |
| ♦   | Stört beim Radio-/Musikhören oder Fernsehen                                                                                                                                                                                                                               | <input type="checkbox"/> <input type="checkbox"/> <input type="checkbox"/> <input type="checkbox"/> <input type="checkbox"/> |
| ♦   | Stört bei Aufenthalt und Erholung draussen                                                                                                                                                                                                                                | <input type="checkbox"/> <input type="checkbox"/> <input type="checkbox"/> <input type="checkbox"/> <input type="checkbox"/> |
| ♦   | Stört Lesen, Nachdenken, Konzentration                                                                                                                                                                                                                                    | <input type="checkbox"/> <input type="checkbox"/> <input type="checkbox"/> <input type="checkbox"/> <input type="checkbox"/> |
| ♦   | Stört häusliche Geselligkeit, z.B. mit Gästen                                                                                                                                                                                                                             | <input type="checkbox"/> <input type="checkbox"/> <input type="checkbox"/> <input type="checkbox"/> <input type="checkbox"/> |
| ♦   | Stört nachts bzw. wenn ich schlafen will                                                                                                                                                                                                                                  | <input type="checkbox"/> <input type="checkbox"/> <input type="checkbox"/> <input type="checkbox"/> <input type="checkbox"/> |
| 2.4 | Durch welche Fahrzeuge auf der Strasse werden Sie besonders gestört oder belästigt?<br><input type="checkbox"/> keine <input type="checkbox"/> Autos <input type="checkbox"/> Lastwagen/Lieferwagen <input type="checkbox"/> Motorräder <input type="checkbox"/> Tram/Bus | 24a                                                                                                                          |
| 2.5 | Werden Sie durch Strassenlärm zu bestimmten Zeiten (am Tag oder in der Nacht) besonders gestört oder belästigt? <input type="checkbox"/> nein                                                                                                                             |                                                                                                                              |
|     | <input type="checkbox"/> ja, von ____ : ____ bis ____ : ____ Uhr                                                                                                                                                                                                          | 27a                                                                                                                          |
|     | und von ____ : ____ bis ____ : ____ Uhr                                                                                                                                                                                                                                   | 27b                                                                                                                          |
|     | und von ____ : ____ bis ____ : ____ Uhr                                                                                                                                                                                                                                   | 27c                                                                                                                          |

|                                                                                                                                                                                                                                                                                                                                                                                                                                                                                                                                                                                                                                                                                                                                                                                                                                                                                                                                                                                                                                                                                                                                                                                                                                                                                         |                                                                                         |
|-----------------------------------------------------------------------------------------------------------------------------------------------------------------------------------------------------------------------------------------------------------------------------------------------------------------------------------------------------------------------------------------------------------------------------------------------------------------------------------------------------------------------------------------------------------------------------------------------------------------------------------------------------------------------------------------------------------------------------------------------------------------------------------------------------------------------------------------------------------------------------------------------------------------------------------------------------------------------------------------------------------------------------------------------------------------------------------------------------------------------------------------------------------------------------------------------------------------------------------------------------------------------------------------|-----------------------------------------------------------------------------------------|
| <p>3.1 Geben Sie bitte auf der folgenden Messlatte an, für wie lärmempfindlich Sie sich ganz allgemein halten. Sind Sie...</p> <div style="text-align: center;"> </div>                                                                                                                                                                                                                                                                                                                                                                                                                                                                                                                                                                                                                                                                                                                                                                                                                                                                                                                                                                                                                                                                                                                 | 31a                                                                                     |
| <p>4.1 Es folgen einige Fragen zum Schlafverhalten. Wie ist die Ausrichtung Ihres Schlafzimmers zur nächstgelegenen Strasse?<br/> <input type="checkbox"/> von der Strasse weg    <input type="checkbox"/> seitlich zur Strasse    <input type="checkbox"/> auf die Strasse gerichtet</p>                                                                                                                                                                                                                                                                                                                                                                                                                                                                                                                                                                                                                                                                                                                                                                                                                                                                                                                                                                                               | 41a                                                                                     |
| <p>4.2 Verfügen Sie in Ihrer Wohnung über eine automatische Lüftung bzw. eine sog. Komfortlüftung (Minergie-Häuser):    <input type="checkbox"/> ja    <input type="checkbox"/> nein    <input type="checkbox"/> weiss nicht</p>                                                                                                                                                                                                                                                                                                                                                                                                                                                                                                                                                                                                                                                                                                                                                                                                                                                                                                                                                                                                                                                        | 42a                                                                                     |
| <p>4.3 In welcher Stellung halten Sie nachts die Schlafzimmerfenster mehrheitlich?</p> <p>♦ im Sommer:    <input type="checkbox"/> zu    <input type="checkbox"/> offen/halboffen</p> <p>♦ im Winter:    <input type="checkbox"/> zu    <input type="checkbox"/> offen/halboffen</p> <p>Falls offen im Sommer, warum?    <input type="checkbox"/> Frischluftzufuhr    <input type="checkbox"/> Abkühlung    <input type="checkbox"/> anderes</p> <p>Falls zu im Sommer, warum?    <input type="checkbox"/> Lärm (von aussen)    <input type="checkbox"/> Wärmeverlust    <input type="checkbox"/> anderes</p> <p>Falls offen im Winter, warum?    <input type="checkbox"/> Frischluftzufuhr    <input type="checkbox"/> Abkühlung    <input type="checkbox"/> anderes</p> <p>Falls zu im Winter, warum?    <input type="checkbox"/> Lärm (von aussen)    <input type="checkbox"/> Wärmeverlust    <input type="checkbox"/> anderes</p> <p>Wenn draussen nicht der geringste Lärm (egal welcher Art) wäre, was wäre Ihre bevorzugte Stellung der Schlafzimmerfenster? ♦ im Sommer: <input type="checkbox"/> zu    <input type="checkbox"/> offen/halboffen</p> <p style="text-align: right;">♦ im Winter:    <input type="checkbox"/> zu    <input type="checkbox"/> offen/halboffen</p> | <p>43a</p> <p>43b</p> <p>43c</p> <p>43d</p> <p>43e</p> <p>43f</p> <p>43g</p> <p>43h</p> |
| <p>4.4 Wie oft benutzen Sie zum Schlafen Ohrstöpsel oder Ohropax?    <b>immer</b>    <b>oft</b>    <b>gelegentlich</b>    <b>selten</b>    <b>nie</b></p> <p style="text-align: center;"> <input type="checkbox"/> — <input type="checkbox"/> — <input type="checkbox"/> — <input type="checkbox"/> — <input type="checkbox"/> </p> <p>falls ja, warum hauptsächlich?    <input type="checkbox"/> wegen Geräuschen von aussen</p> <p style="text-align: right;">44b</p> <p style="text-align: right;">44c</p> <p style="text-align: right;">44d</p>                                                                                                                                                                                                                                                                                                                                                                                                                                                                                                                                                                                                                                                                                                                                     | <p>44a</p> <p>44b</p> <p>44c</p> <p>44d</p>                                             |
| <p>5.1 Hier sehen Sie eine Messlatte von 0 bis 10, auf der Sie angeben können, wie sehr Sie der Strassenlärm insgesamt gestört oder belästigt hat. Wenn Sie sich äusserst gestört oder belästigt fühlten, umkreisen Sie die 10, wenn Sie sich überhaupt nicht gestört oder belästigt fühlten, umkreisen Sie bitte die 0, und wenn Sie irgendwo dazwischenliegen, umkreisen Sie bitte eine Zahl zwischen 0 und 10.</p> <p>Wenn Sie nun an die letzten zwölf Monate hier bei Ihnen denken, welche Zahl zwischen 0 und 10 gibt am besten an, wie stark Sie sich durch den Strassenlärm insgesamt gestört oder belästigt fühlten?</p> <div style="text-align: center;"> </div>                                                                                                                                                                                                                                                                                                                                                                                                                                                                                                                                                                                                              | 22a                                                                                     |
| <p>5.2 Wenn Sie einmal an die letzten zwölf Monate hier bei Ihnen denken, wie stark haben Sie sich durch Strassenlärm insgesamt gestört oder belästigt gefühlt?</p> <div style="text-align: center;"> <p><b>äusserst</b>    <b>stark</b>    <b>mittelmässig</b>    <b>etwas</b>    <b>überhaupt nicht</b></p> <p> <input type="checkbox"/> — <input type="checkbox"/> — <input type="checkbox"/> — <input type="checkbox"/> — <input type="checkbox"/> </p> </div>                                                                                                                                                                                                                                                                                                                                                                                                                                                                                                                                                                                                                                                                                                                                                                                                                      | 21a                                                                                     |
| <p>6. Heutiges Datum: ..... ☺ <b>Besten Dank für Ihre Mitarbeit!</b> ☺</p>                                                                                                                                                                                                                                                                                                                                                                                                                                                                                                                                                                                                                                                                                                                                                                                                                                                                                                                                                                                                                                                                                                                                                                                                              |                                                                                         |
