# Supplementary material for: Effects of Scale, Question Location, Order of Response Alternatives, and Season on Self-Reported Noise Annoyance Using ICBEN Scales: A Field Experiment
Source: MDPI journal article supplement (doi:10.3390/ijerph13111163), 2016-11-23
Supplement: s1 [file s1]

# Short survey on noise in the living environment «H» «PersID»

Please answer all questions one by one in sequence. Always tick the answer/checkbox that best applies to you. If multiple answers apply, tick all that apply. Thank you very much.

| General Information |                                                                                                                                                                                                                             |            |
|---------------------|-----------------------------------------------------------------------------------------------------------------------------------------------------------------------------------------------------------------------------|------------|
| 1.1                 | Gender: <input type="checkbox"/> female <input type="checkbox"/> male Year of birth: .....                                                                                                                                  | 11ab       |
| 1.2                 | Is the address in the cover letter the address where you live most of the time? <input type="checkbox"/> yes <input type="checkbox"/> no                                                                                    | 12a        |
| 1.3                 | How long have you been living in your current home? ..... years                                                                                                                                                             | 13a        |
| 1.4                 | Do you live: <input type="checkbox"/> alone <input type="checkbox"/> as a family/couple <input type="checkbox"/> in a flat share <input type="checkbox"/> other                                                             | 14a        |
| 1.5                 | What kind of dwelling do you live in? <input type="checkbox"/> row house <input type="checkbox"/> detached house<br><input type="checkbox"/> apartment on ground floor<br><input type="checkbox"/> apartment on ..... floor | 15a<br>15b |
| 1.6                 | Are you the owner or tenant of your apartment/house?<br><input type="checkbox"/> owner <input type="checkbox"/> tenant or sub-tenant                                                                                        | 16a        |

| Living Environment and Noise                   |                                                                                                                                                                                                                                                                                                                                                                                                                                                                                                                                                                                                                                                                                                                                                                                                                                                                                                                                                                                                                                                                                                                                                                                                                                                                                                                                                                                                                                                                                                                                                                                                                                                                                                               |                          |                          |                          |                          |                 |                      |  |                                            |                          |                          |                          |                          |                          |     |                                                |                          |                          |                          |                          |                          |     |                                    |                          |                          |                          |                          |                          |     |                                             |                          |                          |                          |                          |                          |     |                                          |                          |                          |                          |                          |                          |     |                                           |                          |                          |                          |                          |                          |     |  |
|------------------------------------------------|---------------------------------------------------------------------------------------------------------------------------------------------------------------------------------------------------------------------------------------------------------------------------------------------------------------------------------------------------------------------------------------------------------------------------------------------------------------------------------------------------------------------------------------------------------------------------------------------------------------------------------------------------------------------------------------------------------------------------------------------------------------------------------------------------------------------------------------------------------------------------------------------------------------------------------------------------------------------------------------------------------------------------------------------------------------------------------------------------------------------------------------------------------------------------------------------------------------------------------------------------------------------------------------------------------------------------------------------------------------------------------------------------------------------------------------------------------------------------------------------------------------------------------------------------------------------------------------------------------------------------------------------------------------------------------------------------------------|--------------------------|--------------------------|--------------------------|--------------------------|-----------------|----------------------|--|--------------------------------------------|--------------------------|--------------------------|--------------------------|--------------------------|--------------------------|-----|------------------------------------------------|--------------------------|--------------------------|--------------------------|--------------------------|--------------------------|-----|------------------------------------|--------------------------|--------------------------|--------------------------|--------------------------|--------------------------|-----|---------------------------------------------|--------------------------|--------------------------|--------------------------|--------------------------|--------------------------|-----|------------------------------------------|--------------------------|--------------------------|--------------------------|--------------------------|--------------------------|-----|-------------------------------------------|--------------------------|--------------------------|--------------------------|--------------------------|--------------------------|-----|--|
| 2.1                                            | Below is a list of characteristics that are important for living. How satisfied are you regarding these at your home?                                                                                                                                                                                                                                                                                                                                                                                                                                                                                                                                                                                                                                                                                                                                                                                                                                                                                                                                                                                                                                                                                                                                                                                                                                                                                                                                                                                                                                                                                                                                                                                         |                          |                          |                          |                          |                 |                      |  |                                            |                          |                          |                          |                          |                          |     |                                                |                          |                          |                          |                          |                          |     |                                    |                          |                          |                          |                          |                          |     |                                             |                          |                          |                          |                          |                          |     |                                          |                          |                          |                          |                          |                          |     |                                           |                          |                          |                          |                          |                          |     |  |
|                                                | <table border="0"> <thead> <tr> <th></th> <th>not at all<br/>satisfied</th> <th>slightly<br/>satisfied</th> <th>modera-<br/>tely satisf.</th> <th>very<br/>satisf.</th> <th>extremely<br/>satisf.</th> <th></th> </tr> </thead> <tbody> <tr> <td>♦ living comfort in general</td> <td><input type="checkbox"/></td> <td><input type="checkbox"/></td> <td><input type="checkbox"/></td> <td><input type="checkbox"/></td> <td><input type="checkbox"/></td> <td>23a</td> </tr> <tr> <td>♦ spaciousness</td> <td><input type="checkbox"/></td> <td><input type="checkbox"/></td> <td><input type="checkbox"/></td> <td><input type="checkbox"/></td> <td><input type="checkbox"/></td> <td>23b</td> </tr> <tr> <td>♦ distances to work / schools etc.</td> <td><input type="checkbox"/></td> <td><input type="checkbox"/></td> <td><input type="checkbox"/></td> <td><input type="checkbox"/></td> <td><input type="checkbox"/></td> <td>23c</td> </tr> <tr> <td>♦ exposure to noise</td> <td><input type="checkbox"/></td> <td><input type="checkbox"/></td> <td><input type="checkbox"/></td> <td><input type="checkbox"/></td> <td><input type="checkbox"/></td> <td>23d</td> </tr> <tr> <td>♦ size of balcony, terrace, or garden</td> <td><input type="checkbox"/></td> <td><input type="checkbox"/></td> <td><input type="checkbox"/></td> <td><input type="checkbox"/></td> <td><input type="checkbox"/></td> <td>23e</td> </tr> <tr> <td>♦ lightness, sunshine</td> <td><input type="checkbox"/></td> <td><input type="checkbox"/></td> <td><input type="checkbox"/></td> <td><input type="checkbox"/></td> <td><input type="checkbox"/></td> <td>23f</td> </tr> </tbody> </table>                     |                          | not at all<br>satisfied  | slightly<br>satisfied    | modera-<br>tely satisf.  | very<br>satisf. | extremely<br>satisf. |  | ♦ living comfort in general                | <input type="checkbox"/> | 23a | ♦ spaciousness                                 | <input type="checkbox"/> | 23b | ♦ distances to work / schools etc. | <input type="checkbox"/> | 23c | ♦ exposure to noise                         | <input type="checkbox"/> | 23d | ♦ size of balcony, terrace, or garden    | <input type="checkbox"/> | 23e | ♦ lightness, sunshine                     | <input type="checkbox"/> | 23f |  |
|                                                | not at all<br>satisfied                                                                                                                                                                                                                                                                                                                                                                                                                                                                                                                                                                                                                                                                                                                                                                                                                                                                                                                                                                                                                                                                                                                                                                                                                                                                                                                                                                                                                                                                                                                                                                                                                                                                                       | slightly<br>satisfied    | modera-<br>tely satisf.  | very<br>satisf.          | extremely<br>satisf.     |                 |                      |  |                                            |                          |                          |                          |                          |                          |     |                                                |                          |                          |                          |                          |                          |     |                                    |                          |                          |                          |                          |                          |     |                                             |                          |                          |                          |                          |                          |     |                                          |                          |                          |                          |                          |                          |     |                                           |                          |                          |                          |                          |                          |     |  |
| ♦ living comfort in general                    | <input type="checkbox"/>                                                                                                                                                                                                                                                                                                                                                                                                                                                                                                                                                                                                                                                                                                                                                                                                                                                                                                                                                                                                                                                                                                                                                                                                                                                                                                                                                                                                                                                                                                                                                                                                                                                                                      | <input type="checkbox"/> | <input type="checkbox"/> | <input type="checkbox"/> | <input type="checkbox"/> | 23a             |                      |  |                                            |                          |                          |                          |                          |                          |     |                                                |                          |                          |                          |                          |                          |     |                                    |                          |                          |                          |                          |                          |     |                                             |                          |                          |                          |                          |                          |     |                                          |                          |                          |                          |                          |                          |     |                                           |                          |                          |                          |                          |                          |     |  |
| ♦ spaciousness                                 | <input type="checkbox"/>                                                                                                                                                                                                                                                                                                                                                                                                                                                                                                                                                                                                                                                                                                                                                                                                                                                                                                                                                                                                                                                                                                                                                                                                                                                                                                                                                                                                                                                                                                                                                                                                                                                                                      | <input type="checkbox"/> | <input type="checkbox"/> | <input type="checkbox"/> | <input type="checkbox"/> | 23b             |                      |  |                                            |                          |                          |                          |                          |                          |     |                                                |                          |                          |                          |                          |                          |     |                                    |                          |                          |                          |                          |                          |     |                                             |                          |                          |                          |                          |                          |     |                                          |                          |                          |                          |                          |                          |     |                                           |                          |                          |                          |                          |                          |     |  |
| ♦ distances to work / schools etc.             | <input type="checkbox"/>                                                                                                                                                                                                                                                                                                                                                                                                                                                                                                                                                                                                                                                                                                                                                                                                                                                                                                                                                                                                                                                                                                                                                                                                                                                                                                                                                                                                                                                                                                                                                                                                                                                                                      | <input type="checkbox"/> | <input type="checkbox"/> | <input type="checkbox"/> | <input type="checkbox"/> | 23c             |                      |  |                                            |                          |                          |                          |                          |                          |     |                                                |                          |                          |                          |                          |                          |     |                                    |                          |                          |                          |                          |                          |     |                                             |                          |                          |                          |                          |                          |     |                                          |                          |                          |                          |                          |                          |     |                                           |                          |                          |                          |                          |                          |     |  |
| ♦ exposure to noise                            | <input type="checkbox"/>                                                                                                                                                                                                                                                                                                                                                                                                                                                                                                                                                                                                                                                                                                                                                                                                                                                                                                                                                                                                                                                                                                                                                                                                                                                                                                                                                                                                                                                                                                                                                                                                                                                                                      | <input type="checkbox"/> | <input type="checkbox"/> | <input type="checkbox"/> | <input type="checkbox"/> | 23d             |                      |  |                                            |                          |                          |                          |                          |                          |     |                                                |                          |                          |                          |                          |                          |     |                                    |                          |                          |                          |                          |                          |     |                                             |                          |                          |                          |                          |                          |     |                                          |                          |                          |                          |                          |                          |     |                                           |                          |                          |                          |                          |                          |     |  |
| ♦ size of balcony, terrace, or garden          | <input type="checkbox"/>                                                                                                                                                                                                                                                                                                                                                                                                                                                                                                                                                                                                                                                                                                                                                                                                                                                                                                                                                                                                                                                                                                                                                                                                                                                                                                                                                                                                                                                                                                                                                                                                                                                                                      | <input type="checkbox"/> | <input type="checkbox"/> | <input type="checkbox"/> | <input type="checkbox"/> | 23e             |                      |  |                                            |                          |                          |                          |                          |                          |     |                                                |                          |                          |                          |                          |                          |     |                                    |                          |                          |                          |                          |                          |     |                                             |                          |                          |                          |                          |                          |     |                                          |                          |                          |                          |                          |                          |     |                                           |                          |                          |                          |                          |                          |     |  |
| ♦ lightness, sunshine                          | <input type="checkbox"/>                                                                                                                                                                                                                                                                                                                                                                                                                                                                                                                                                                                                                                                                                                                                                                                                                                                                                                                                                                                                                                                                                                                                                                                                                                                                                                                                                                                                                                                                                                                                                                                                                                                                                      | <input type="checkbox"/> | <input type="checkbox"/> | <input type="checkbox"/> | <input type="checkbox"/> | 23f             |                      |  |                                            |                          |                          |                          |                          |                          |     |                                                |                          |                          |                          |                          |                          |     |                                    |                          |                          |                          |                          |                          |     |                                             |                          |                          |                          |                          |                          |     |                                          |                          |                          |                          |                          |                          |     |                                           |                          |                          |                          |                          |                          |     |  |
| 2.2                                            | Is there anything in your home that bothers or disturbs you in particular?<br><input type="checkbox"/> no <input type="checkbox"/> yes, that is? .....                                                                                                                                                                                                                                                                                                                                                                                                                                                                                                                                                                                                                                                                                                                                                                                                                                                                                                                                                                                                                                                                                                                                                                                                                                                                                                                                                                                                                                                                                                                                                        | 24a                      |                          |                          |                          |                 |                      |  |                                            |                          |                          |                          |                          |                          |     |                                                |                          |                          |                          |                          |                          |     |                                    |                          |                          |                          |                          |                          |     |                                             |                          |                          |                          |                          |                          |     |                                          |                          |                          |                          |                          |                          |     |                                           |                          |                          |                          |                          |                          |     |  |
| 2.3                                            | How often are you disturbed by road traffic noise in the following activities?                                                                                                                                                                                                                                                                                                                                                                                                                                                                                                                                                                                                                                                                                                                                                                                                                                                                                                                                                                                                                                                                                                                                                                                                                                                                                                                                                                                                                                                                                                                                                                                                                                |                          |                          |                          |                          |                 |                      |  |                                            |                          |                          |                          |                          |                          |     |                                                |                          |                          |                          |                          |                          |     |                                    |                          |                          |                          |                          |                          |     |                                             |                          |                          |                          |                          |                          |     |                                          |                          |                          |                          |                          |                          |     |                                           |                          |                          |                          |                          |                          |     |  |
|                                                | <table border="0"> <thead> <tr> <th></th> <th>never</th> <th>rarely</th> <th>some-<br/>times</th> <th>often</th> <th>always</th> <th></th> </tr> </thead> <tbody> <tr> <td>♦ Disturbs conversations, phone calls etc.</td> <td><input type="checkbox"/></td> <td><input type="checkbox"/></td> <td><input type="checkbox"/></td> <td><input type="checkbox"/></td> <td><input type="checkbox"/></td> <td>25a</td> </tr> <tr> <td>♦ Disturbs listening to the radio, watching TV</td> <td><input type="checkbox"/></td> <td><input type="checkbox"/></td> <td><input type="checkbox"/></td> <td><input type="checkbox"/></td> <td><input type="checkbox"/></td> <td>25b</td> </tr> <tr> <td>♦ Disturbs recreation outdoors</td> <td><input type="checkbox"/></td> <td><input type="checkbox"/></td> <td><input type="checkbox"/></td> <td><input type="checkbox"/></td> <td><input type="checkbox"/></td> <td>25c</td> </tr> <tr> <td>♦ Disturbs reading, thinking, concentration</td> <td><input type="checkbox"/></td> <td><input type="checkbox"/></td> <td><input type="checkbox"/></td> <td><input type="checkbox"/></td> <td><input type="checkbox"/></td> <td>25d</td> </tr> <tr> <td>♦ Disturbs sociability, e.g. with guests</td> <td><input type="checkbox"/></td> <td><input type="checkbox"/></td> <td><input type="checkbox"/></td> <td><input type="checkbox"/></td> <td><input type="checkbox"/></td> <td>25e</td> </tr> <tr> <td>♦ Disturbs at night, when I want to sleep</td> <td><input type="checkbox"/></td> <td><input type="checkbox"/></td> <td><input type="checkbox"/></td> <td><input type="checkbox"/></td> <td><input type="checkbox"/></td> <td>25f</td> </tr> </tbody> </table> |                          | never                    | rarely                   | some-<br>times           | often           | always               |  | ♦ Disturbs conversations, phone calls etc. | <input type="checkbox"/> | 25a | ♦ Disturbs listening to the radio, watching TV | <input type="checkbox"/> | 25b | ♦ Disturbs recreation outdoors     | <input type="checkbox"/> | 25c | ♦ Disturbs reading, thinking, concentration | <input type="checkbox"/> | 25d | ♦ Disturbs sociability, e.g. with guests | <input type="checkbox"/> | 25e | ♦ Disturbs at night, when I want to sleep | <input type="checkbox"/> | 25f |  |
|                                                | never                                                                                                                                                                                                                                                                                                                                                                                                                                                                                                                                                                                                                                                                                                                                                                                                                                                                                                                                                                                                                                                                                                                                                                                                                                                                                                                                                                                                                                                                                                                                                                                                                                                                                                         | rarely                   | some-<br>times           | often                    | always                   |                 |                      |  |                                            |                          |                          |                          |                          |                          |     |                                                |                          |                          |                          |                          |                          |     |                                    |                          |                          |                          |                          |                          |     |                                             |                          |                          |                          |                          |                          |     |                                          |                          |                          |                          |                          |                          |     |                                           |                          |                          |                          |                          |                          |     |  |
| ♦ Disturbs conversations, phone calls etc.     | <input type="checkbox"/>                                                                                                                                                                                                                                                                                                                                                                                                                                                                                                                                                                                                                                                                                                                                                                                                                                                                                                                                                                                                                                                                                                                                                                                                                                                                                                                                                                                                                                                                                                                                                                                                                                                                                      | <input type="checkbox"/> | <input type="checkbox"/> | <input type="checkbox"/> | <input type="checkbox"/> | 25a             |                      |  |                                            |                          |                          |                          |                          |                          |     |                                                |                          |                          |                          |                          |                          |     |                                    |                          |                          |                          |                          |                          |     |                                             |                          |                          |                          |                          |                          |     |                                          |                          |                          |                          |                          |                          |     |                                           |                          |                          |                          |                          |                          |     |  |
| ♦ Disturbs listening to the radio, watching TV | <input type="checkbox"/>                                                                                                                                                                                                                                                                                                                                                                                                                                                                                                                                                                                                                                                                                                                                                                                                                                                                                                                                                                                                                                                                                                                                                                                                                                                                                                                                                                                                                                                                                                                                                                                                                                                                                      | <input type="checkbox"/> | <input type="checkbox"/> | <input type="checkbox"/> | <input type="checkbox"/> | 25b             |                      |  |                                            |                          |                          |                          |                          |                          |     |                                                |                          |                          |                          |                          |                          |     |                                    |                          |                          |                          |                          |                          |     |                                             |                          |                          |                          |                          |                          |     |                                          |                          |                          |                          |                          |                          |     |                                           |                          |                          |                          |                          |                          |     |  |
| ♦ Disturbs recreation outdoors                 | <input type="checkbox"/>                                                                                                                                                                                                                                                                                                                                                                                                                                                                                                                                                                                                                                                                                                                                                                                                                                                                                                                                                                                                                                                                                                                                                                                                                                                                                                                                                                                                                                                                                                                                                                                                                                                                                      | <input type="checkbox"/> | <input type="checkbox"/> | <input type="checkbox"/> | <input type="checkbox"/> | 25c             |                      |  |                                            |                          |                          |                          |                          |                          |     |                                                |                          |                          |                          |                          |                          |     |                                    |                          |                          |                          |                          |                          |     |                                             |                          |                          |                          |                          |                          |     |                                          |                          |                          |                          |                          |                          |     |                                           |                          |                          |                          |                          |                          |     |  |
| ♦ Disturbs reading, thinking, concentration    | <input type="checkbox"/>                                                                                                                                                                                                                                                                                                                                                                                                                                                                                                                                                                                                                                                                                                                                                                                                                                                                                                                                                                                                                                                                                                                                                                                                                                                                                                                                                                                                                                                                                                                                                                                                                                                                                      | <input type="checkbox"/> | <input type="checkbox"/> | <input type="checkbox"/> | <input type="checkbox"/> | 25d             |                      |  |                                            |                          |                          |                          |                          |                          |     |                                                |                          |                          |                          |                          |                          |     |                                    |                          |                          |                          |                          |                          |     |                                             |                          |                          |                          |                          |                          |     |                                          |                          |                          |                          |                          |                          |     |                                           |                          |                          |                          |                          |                          |     |  |
| ♦ Disturbs sociability, e.g. with guests       | <input type="checkbox"/>                                                                                                                                                                                                                                                                                                                                                                                                                                                                                                                                                                                                                                                                                                                                                                                                                                                                                                                                                                                                                                                                                                                                                                                                                                                                                                                                                                                                                                                                                                                                                                                                                                                                                      | <input type="checkbox"/> | <input type="checkbox"/> | <input type="checkbox"/> | <input type="checkbox"/> | 25e             |                      |  |                                            |                          |                          |                          |                          |                          |     |                                                |                          |                          |                          |                          |                          |     |                                    |                          |                          |                          |                          |                          |     |                                             |                          |                          |                          |                          |                          |     |                                          |                          |                          |                          |                          |                          |     |                                           |                          |                          |                          |                          |                          |     |  |
| ♦ Disturbs at night, when I want to sleep      | <input type="checkbox"/>                                                                                                                                                                                                                                                                                                                                                                                                                                                                                                                                                                                                                                                                                                                                                                                                                                                                                                                                                                                                                                                                                                                                                                                                                                                                                                                                                                                                                                                                                                                                                                                                                                                                                      | <input type="checkbox"/> | <input type="checkbox"/> | <input type="checkbox"/> | <input type="checkbox"/> | 25f             |                      |  |                                            |                          |                          |                          |                          |                          |     |                                                |                          |                          |                          |                          |                          |     |                                    |                          |                          |                          |                          |                          |     |                                             |                          |                          |                          |                          |                          |     |                                          |                          |                          |                          |                          |                          |     |                                           |                          |                          |                          |                          |                          |     |  |
| 2.4                                            | By which kind of vehicles are you disturbed or annoyed in particular?<br><input type="checkbox"/> none <input type="checkbox"/> cars <input type="checkbox"/> trucks, delivery vehicles <input type="checkbox"/> motorcycles <input type="checkbox"/> trams/buses                                                                                                                                                                                                                                                                                                                                                                                                                                                                                                                                                                                                                                                                                                                                                                                                                                                                                                                                                                                                                                                                                                                                                                                                                                                                                                                                                                                                                                             | 26a                      |                          |                          |                          |                 |                      |  |                                            |                          |                          |                          |                          |                          |     |                                                |                          |                          |                          |                          |                          |     |                                    |                          |                          |                          |                          |                          |     |                                             |                          |                          |                          |                          |                          |     |                                          |                          |                          |                          |                          |                          |     |                                           |                          |                          |                          |                          |                          |     |  |
| 2.5                                            | Are you particularly disturbed or annoyed by road traffic noise at certain times (night or day)?<br><input type="checkbox"/> no<br><input type="checkbox"/> yes, from __ : __ to __ : __ o'clock<br>and from __ : __ to __ : __ o'clock<br>and from __ : __ to __ : __ o'clock                                                                                                                                                                                                                                                                                                                                                                                                                                                                                                                                                                                                                                                                                                                                                                                                                                                                                                                                                                                                                                                                                                                                                                                                                                                                                                                                                                                                                                | 27a<br>27b<br>27c        |                          |                          |                          |                 |                      |  |                                            |                          |                          |                          |                          |                          |     |                                                |                          |                          |                          |                          |                          |     |                                    |                          |                          |                          |                          |                          |     |                                             |                          |                          |                          |                          |                          |     |                                          |                          |                          |                          |                          |                          |     |                                           |                          |                          |                          |                          |                          |     |  |

|                                                                                                                                                                                                                                                                                                                                                                                                                                                                                                                                                                                                                                                                                                                                                                                                                                                                                                                                                                                                                                                                                                                                                                                                                                                            |                                                                                         |
|------------------------------------------------------------------------------------------------------------------------------------------------------------------------------------------------------------------------------------------------------------------------------------------------------------------------------------------------------------------------------------------------------------------------------------------------------------------------------------------------------------------------------------------------------------------------------------------------------------------------------------------------------------------------------------------------------------------------------------------------------------------------------------------------------------------------------------------------------------------------------------------------------------------------------------------------------------------------------------------------------------------------------------------------------------------------------------------------------------------------------------------------------------------------------------------------------------------------------------------------------------|-----------------------------------------------------------------------------------------|
| <p>3.1 Please indicate how noise sensitive you are in general. Are you...</p> <div style="text-align: center;"> </div>                                                                                                                                                                                                                                                                                                                                                                                                                                                                                                                                                                                                                                                                                                                                                                                                                                                                                                                                                                                                                                                                                                                                     | 31a                                                                                     |
| <p>4.1 The following questions pertain to your sleeping habits. What is the orientation of your bedroom towards the nearest street?</p> <p><input type="checkbox"/> away from street      <input type="checkbox"/> perpendicular to street      <input type="checkbox"/> pointing towards street</p>                                                                                                                                                                                                                                                                                                                                                                                                                                                                                                                                                                                                                                                                                                                                                                                                                                                                                                                                                       | 41a                                                                                     |
| <p>4.2 Do you have mechanical ventilation (with heat recovery) in your home:</p> <p><input type="checkbox"/> yes      <input type="checkbox"/> no      <input type="checkbox"/> don't know</p>                                                                                                                                                                                                                                                                                                                                                                                                                                                                                                                                                                                                                                                                                                                                                                                                                                                                                                                                                                                                                                                             | 42a                                                                                     |
| <p>4.3 In which position do you keep your bedroom windows usually?</p> <p>♦ in summer: <input type="checkbox"/> closed      <input type="checkbox"/> open or half-open</p> <p>♦ in winter: <input type="checkbox"/> closed      <input type="checkbox"/> open or half-open</p> <p>if open during summer, why?      <input type="checkbox"/> fresh air supply      <input type="checkbox"/> cooling      <input type="checkbox"/> other</p> <p>if closed during summer, why?      <input type="checkbox"/> noise (from outside)      <input type="checkbox"/> heat loss      <input type="checkbox"/> other</p> <p>if open during winter, why?      <input type="checkbox"/> fresh air supply      <input type="checkbox"/> cooling      <input type="checkbox"/> other</p> <p>if closed during winter, why?      <input type="checkbox"/> noise (from outside)      <input type="checkbox"/> heat loss      <input type="checkbox"/> other</p> <p>If it would be totally calm outside (regardless of source) which window position would you prefer?</p> <p>♦ in summer: <input type="checkbox"/> closed      <input type="checkbox"/> open/half-open</p> <p>♦ in winter: <input type="checkbox"/> closed      <input type="checkbox"/> open/half-open</p> | <p>43a</p> <p>43b</p> <p>43c</p> <p>43d</p> <p>43e</p> <p>43f</p> <p>43g</p> <p>43h</p> |
| <p>4.4 How often do you use earplugs (e.g. Oropax) for sleeping?</p> <p style="text-align: center;">never      rarely      sometimes      often      always</p> <p style="text-align: center;"><input type="checkbox"/> — <input type="checkbox"/> — <input type="checkbox"/> — <input type="checkbox"/> — <input type="checkbox"/></p> <p>If you use them, why?</p> <p><input type="checkbox"/> because of noise from outside the house</p> <p><input type="checkbox"/> because of noise from inside the house</p> <p><input type="checkbox"/> because of noise from within sleeping room (e.g. snoring)</p>                                                                                                                                                                                                                                                                                                                                                                                                                                                                                                                                                                                                                                              | <p>44a</p> <p>44b</p> <p>44c</p> <p>44d</p>                                             |
| <p>5.1 Below is a 0 to 10 opinion scale for how much road traffic noise bothered, disturbed or annoyed you. If you were not at all annoyed choose 0, if you were extremely annoyed choose 10, if you were somewhere in between choose a number between 0 and 10.</p> <p>Thinking about the last 12 months, when you are here at home, what number from 0 to 10 best shows how much you were bothered, disturbed, or annoyed by road traffic noise?</p> <div style="text-align: center;"> </div>                                                                                                                                                                                                                                                                                                                                                                                                                                                                                                                                                                                                                                                                                                                                                            | 22a                                                                                     |
| <p>5.2 Thinking about the last 12 months, when you are here at home, how much did road traffic noise bother, disturb, or annoy you?</p> <div style="text-align: center;"> <p>extremely      very      moderately      slightly      not at all</p> <p><input type="checkbox"/> — <input type="checkbox"/> — <input type="checkbox"/> — <input type="checkbox"/> — <input type="checkbox"/></p> </div>                                                                                                                                                                                                                                                                                                                                                                                                                                                                                                                                                                                                                                                                                                                                                                                                                                                      | 21a                                                                                     |
| <p>6.1 Today's date: ..... ☺ Thank you for your cooperation! ☺</p>                                                                                                                                                                                                                                                                                                                                                                                                                                                                                                                                                                                                                                                                                                                                                                                                                                                                                                                                                                                                                                                                                                                                                                                         |                                                                                         |
