# Supplementary material for: Effects of Scale, Question Location, Order of Response Alternatives, and Season on Self-Reported Noise Annoyance Using ICBEN Scales: A Field Experiment
Source: Int J Environ Res Public Health. 2016 Nov 23;13(11):1163. doi: 10.3390/ijerph13111163 (PMC5129373; doi:10.3390/ijerph13111163)
Supplement: Supplementary file 1 [file ijerph-13-01163-s001.zip]

Archive with 4 entries (4 files):
- S1 Questionnaire Version A (GER).pdf
- S2 Questionnaire Version A (ENG).pdf
- S3 Questionnaire Version H (GER).pdf
- S4 Questionnaire Version H (ENG).pdf
